# Supplementary material
Source: publisher figshare collection journal article supplement (https://acs.figshare.com/ndownloader/files/30584412)

**Table S1.** Contribution of gallic acid (GA) to the astringent and bitter taste perceived from beverages.

**Table S2.** Cell viability. HGT-1 cells were treated with gallic acid (GA) [500, 1000 and 1500  $\mu$ M] for 60 mins. Data are shown as mean  $\pm$  SEM of three biological replicates with 3-4 technical replicates, calculated as treated over control (Cells treated with solvent control are set to 100%). Statistics: One-way ANOVA on Ranks with post-hoc Dunn's method test, vs. control.

**Table S3.** Cell viability. HGT-1 cells wt and TAS2R43 ko and TAS2R4 ko were tested for the cell viability after the incubation with the respective substances and combinations of substances for 10 or 60 min (indicated with \* for the gene expression analysis). Data are shown as mean  $\pm$  SEM of three biological replicates with 3-4 technical replicates, calculated as treated over control (Cells treated with solvent control are set to 100%). Statistics: One-way ANOVA on Ranks with post-hoc Dunn's method test, vs. control.

**Figure S1:** Verification of deletion on mRNA level by Sanger sequencing compared to wild-type HGT-1 cells.

**Table S1.**

| Authors                            | Food item                     | GA Concentration                          | Threshold concentration                                                               |                                                                                      |
|------------------------------------|-------------------------------|-------------------------------------------|---------------------------------------------------------------------------------------|--------------------------------------------------------------------------------------|
|                                    |                               |                                           | Astringency                                                                           | Bitterness                                                                           |
| Glabasnia and Hofmann <sup>2</sup> | Whiskey, oak-matured red wine |                                           | 292 $\mu\text{mol/L}$ , 45 mg/L                                                       | n.d.                                                                                 |
| Kaneko and Hofmann <sup>11</sup>   | Japanese green tea            | 30 $\mu\text{mol/L}$                      | 200 $\mu\text{mol/L}$ ,                                                               | n.d.                                                                                 |
| Hufnagel und Hofmann <sup>3</sup>  | Red wine                      | 19.2 $\mu\text{mol/L}$ (17.5 – 20.2 mg/L) | 292 $\mu\text{mol/L}$ , 50 mg/L                                                       | n.d.                                                                                 |
| Robichaud and Noble <sup>4</sup>   | White wine spiked with GA     |                                           | No threshold determined, but increasing astringency from 59 to 8817 $\mu\text{mol/L}$ | No threshold determined, but increasing bitterness from 59 to 8817 $\mu\text{mol/L}$ |

**Table S2.**

| Cell line              | Treatment                                           | Mean  | SEM  |
|------------------------|-----------------------------------------------------|-------|------|
| <b>HGT-1 wt</b>        | GA [1000 $\mu$ M]                                   | 94.1  | 3.15 |
|                        | Ethanol 1:250 dilution in cell culture medium       | 103.9 | 1.69 |
|                        | Zweigelt 1:250 dilution in cell culture medium      | 101.6 | 2.16 |
|                        | Blaifränkisch 1:250 dilution in cell culture medium | 97.7  | 2.12 |
|                        | Zweigelt + GA [10 $\mu$ M]                          | 100.8 | 3.09 |
|                        | Blaifränkisch + GA [10 $\mu$ M]                     | 107.9 | 3.26 |
|                        | GA [10 $\mu$ M] + 6-Methoxyflavanone [100 $\mu$ M]  | 97.5  | 3.09 |
|                        | GA [10 $\mu$ M] + TMBP [100 $\mu$ M]                | 99.7  | 2.95 |
|                        | GA [10 $\mu$ M] + HED [10 $\mu$ M]                  | 105.7 | 3.48 |
|                        | Zweigelt + GA [10 $\mu$ M] + HED [1 $\mu$ M]        | 105.5 | 1.35 |
|                        | Blaifränkisch + GA [10 $\mu$ M] + HED [1 $\mu$ M]   | 103.0 | 1.36 |
| <b>HGT-1 TAS2R43ko</b> | GA [10 $\mu$ M]                                     | 100.3 | 2.98 |
|                        | GA [10 $\mu$ M] + HED [10 $\mu$ M]                  | 104.6 | 3.42 |
| <b>HGT-1 TAS2R4ko</b>  | GA [1000 $\mu$ M]                                   | 103.8 | 3.81 |

Figure S1

**TAS2R4ko** - Identification of deletion on mRNA level by Sanger sequencing  
**control** (no cleavage)

CTTCGTCTCTTCAAATACGGAAAGGTCAGTCTACCTGTCTGCTTTTTTTGTGTT

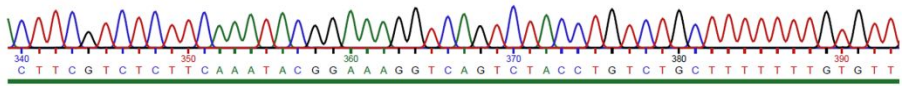

**TAS2R4ko** CTTCGTCTCTTCAAATAC-----9bp-----AGTCTACCTGTCTGCTTTTTTTGTGTT

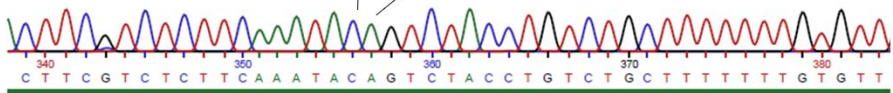

Supplement: Supplementary file 1 [file 30584412]
